# Supplementary material for: Chest radiograph at admission predicts early intubation among inpatient COVID-19 patients
Source: Springer Nature journal article supplement (doi:10.1007/s00330-020-07354-y), 2020-10-13

# Supplemental Figures

Supplemental eFigure 1. Kaplan Meier curves of COVID-19 risk factors with intubation at 7-days after admission

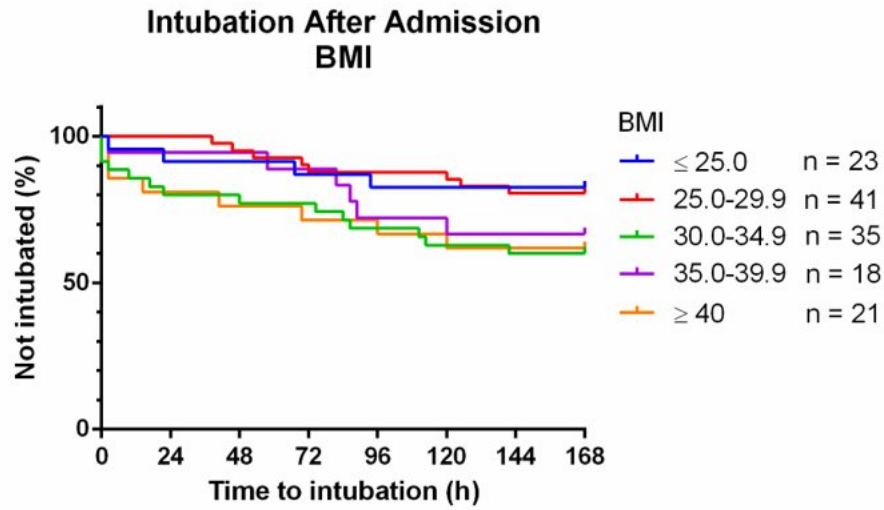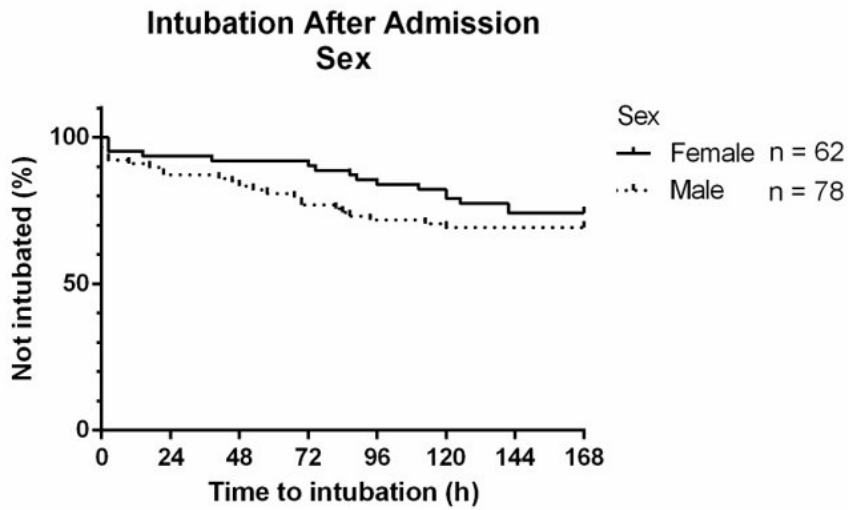

### Intubation After Admission Cardiac Comorbidity

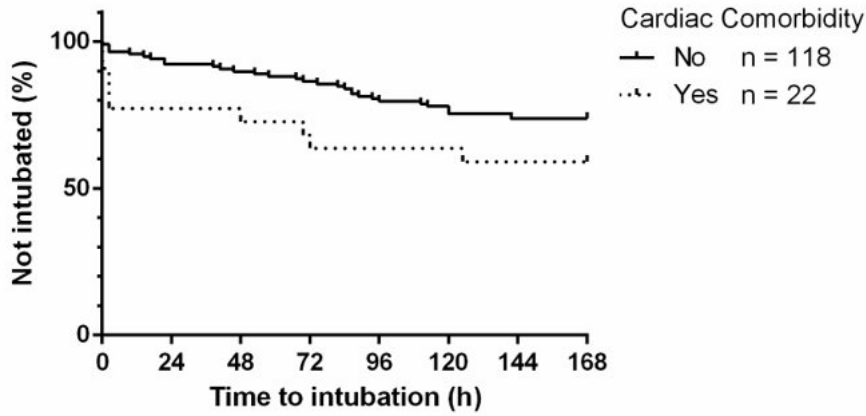

### Intubation After Admission Pulmonary Comorbidity

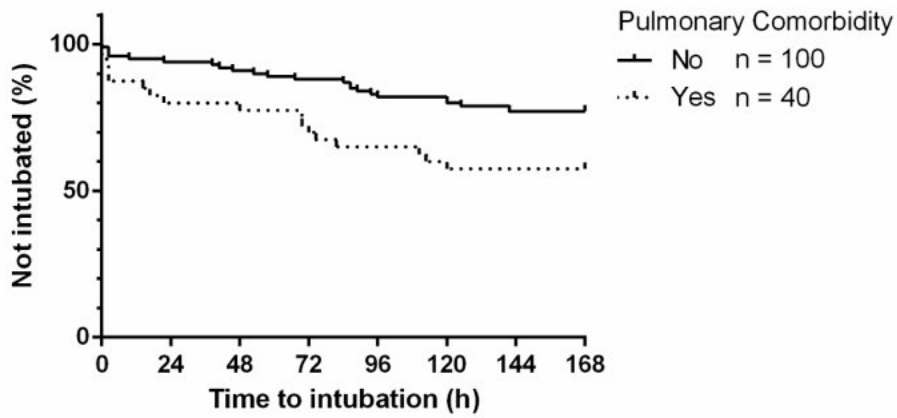

### Intubation After Admission Age

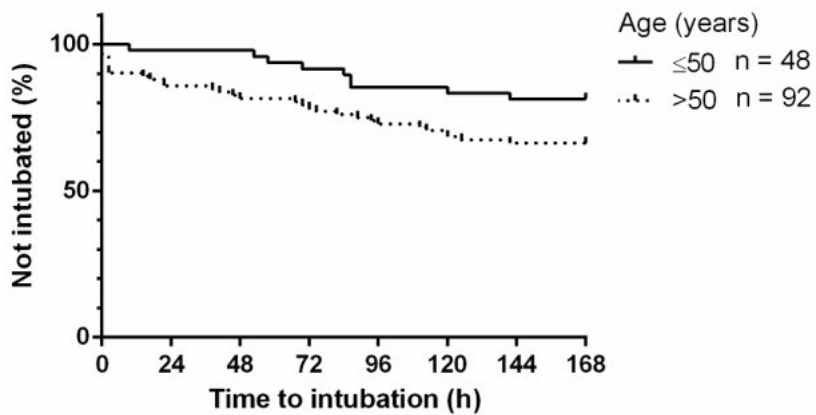

Supplement: 330_2020_7354_MOESM1_ESM.pdf [file 330_2020_7354_MOESM1_ESM.pdf]
